# Supplementary material
Source: Springer Nature journal article supplement (https://www.springermedizin.de/resource/supplementary/12943_2013_1214_MOESM13_ESM.pdf/9552416)
Supplement: MOESM13 [file 9552416]

**A**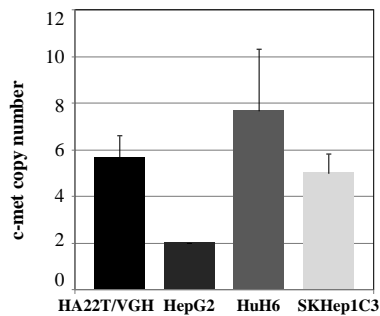

Sorafenib  
responsiveness:

|     |       |     |     |
|-----|-------|-----|-----|
| +++ | +++++ | ++  | +++ |
| 55% | 72%   | 41% | 66% |

**B****HA22T/VGH**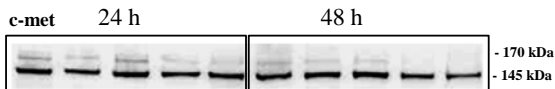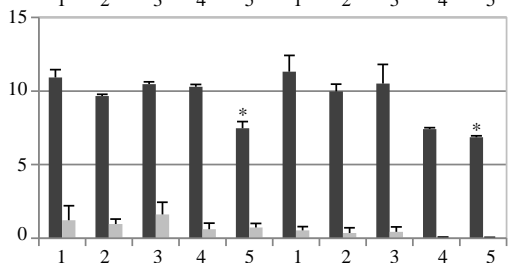**HepG2**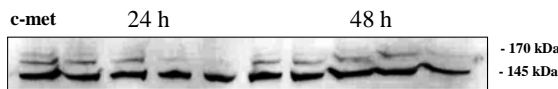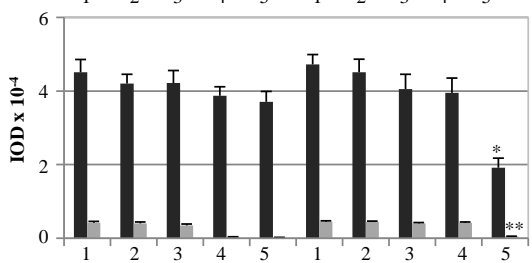**p-c-met (Y-1003)**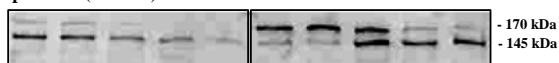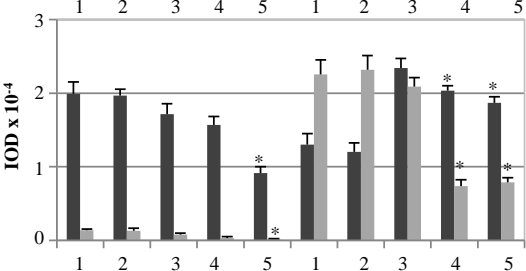**GAPDH**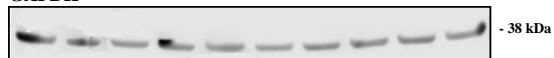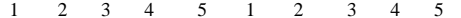

- 1 HepG2  
2 0.1% DMSO  
3 5 μM Sorafenib  
4 10 μM Sorafenib  
5 15 μM Sorafenib
- 145 kDa  
■ 170 kDa

**GAPDH**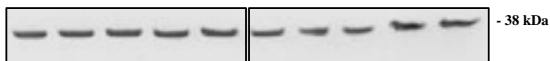

1. HA22T/VGH  
2. 0.1% DMSO  
3. 5μM sorafenib  
4. 10 μM sorafenib  
5. 15 μM sorafenib
- 145 kDa  
■ 170 kDa
